# Supplementary material
Source: publisher site journal article supplement (https://www.spandidos-publications.com/3439/downloadSupplementary)
Supplement: Supplementary file 1 [file downloadSupplementary]

## Sheet: Sheet1
Table SI. Primer pairs for quantitative real-time PCR of lncRNAs.
Primer	Primer sequence（5’-3’）
XLOC_097278-F	CAGACAAGGTCTGCACGAGT
XLOC_097278-R	CCAGCGCTGAGTAAACCAGA
XLOC_083369-F	AGAGGGCCAAAATGTACCTGG
XLOC_083369-R	CAGTGAGTTTAGCTGACAGGA
XLOC_138151-F	CTGGATACGATAACTTGCTGGA
XLOC_138151-R	GCTCCTACAGCACCATCAGTA
XLOC_174539-F	TGGTGCTCTGGCTTCATTCA
XLOC_174539-R	AACAGCACCTGCCTTTACCT
XLOC_053870-F	ACATAGCTCTCTGAATGGGTGG
XLOC_053870-R	GTGTTGAACCCTAGCAAGTCG
GAPDH-F	ACAGCAACAGGGTGGTGGAC
GAPDH-R	TTTGAGGGTGCAGCGAACTT
F, forward; R, reverse. The sequences of primers for the target lncRNAs XLOC_083369, XLOC_053870, XLOC_174539, XLOC_097278, XLOC_138151 and reference gene GAPDH were listed. lncRNA, long non-coding RNA.
